# Supplementary material for: Quality of Life in a Cohort of 1078 Women Diagnosed with Breast Cancer in Spain: 7-Year Follow-Up Results in the MCC-Spain Study
Source: PubMed Central journal article supplement (PMC7696097; doi:10.3390/ijerph17228411), 2020-11-13
Supplement: ijerph-17-08411-s001.pdf [file ijerph-17-08411-s001.pdf]

# **Title: Quality of life in a cohort of 1078 women diagnosed with breast cancer in Spain: 7-year follow-up results in the MCC-Spain study.**

**Journal:** Quality of Life Research

**Authors:** Jéssica Alonso-Molero\*, Trinidad Dierssen-Sotos, Inés Gómez-Acebo, Nerea Fernández de Larrea Baz, Marcela Guevara, Pilar Amiano, Gemma Castaño-Vinyals, Tania Fernández-Villa, Víctor Moreno, Juan Bayo, Ana Molina-Barceló, María Fernández-Ortiz, Claudia Suarez-Calleja, Rafael Marcos-Gragera, Xavier Castells, Gil-Majuelo Leire, Eva Ardanaz, Beatriz Pérez-Gómez, Manolis Kogevinas, Marina Pollán and Javier Llorca.

\*Corresponding author: University of Cantabria – IDIVAL, Santander, Spain. [alonsomoleroj@gmail.com](mailto:alonsomoleroj@gmail.com)

**Table S1.** Main characteristics of the followed patients.

| Variable                                  | Category | Breast cancer<br>(n = 1685) |
|-------------------------------------------|----------|-----------------------------|
| Age (mean±sd)                             |          | 56.5 (±12.6)                |
| Gender                                    | Women    | 1685 (100%)                 |
|                                           | Yes      | 1095 (65.0%)                |
|                                           | No       | 589 (35.0%)                 |
|                                           | Missing  | 1 (0.1%)                    |
| Histology (specific types in each tumour) |          | Ductal: 1276 (75.7%)        |
|                                           |          | Lobular: 110 (6.5%)         |
|                                           |          | Paget disease: 19 (1.1%)    |
|                                           |          | Others: 280 (16.6%)         |
| Tumour size                               | T0       | 23 (1.4%)                   |
|                                           | T1       | 861 (51.1%)                 |
|                                           | T2       | 424 (25.2%)                 |
|                                           | T3       | 73 (4.3%)                   |
|                                           | T4       | 39 (2.3%)                   |
|                                           | Tis      | 109 (6.5%)                  |
|                                           | Missing  | 156 (9.3%)                  |
| Node infiltration                         | N0       | 877 (52.0%)                 |
|                                           | N1       | 441 (26.2%)                 |
|                                           | N2       | 186 (11.0%)                 |
|                                           | N3       | 5 (0.3%)                    |
|                                           | Missing  | 176 (10.4%)                 |
| Metastasis                                | No       | 1376 (81.7%)                |
|                                           | Yes      | 41 (2.4%)                   |
|                                           | Missing  | 268 (15.9%)                 |
|                                           | I        | 702 (41.7%)                 |
|                                           | II       | 479 (28.4%)                 |
|                                           | III      | 179 (10.6%)                 |
|                                           | IV       | 22 (1.3%)                   |
|                                           | Missing  | 303 (18.0%)                 |

**Table S2.** Description of the sociodemographic variables at diagnosis according to answering or not QoL questionnaires.

|                                 |                     | QoL questionnaire (N(%)) |                   |              |              | p-value |
|---------------------------------|---------------------|--------------------------|-------------------|--------------|--------------|---------|
|                                 |                     | Answered                 | Refused to answer | No located   | Deceased     |         |
| Age at diagnosis                | mean ± sd           | 54.86(11.31)             | 59.63(13.48)      | 55.61(13.56) | 61.54(15.32) | <0.001  |
| Menopausal status               | Postmenopausal      | 637(59.09)               | 53(66.25)         | 173(53.89)   | 143(69.42)   | 0.12    |
|                                 | Premenopausal       | 441(40.91)               | 27(33.75)         | 148(46.11)   | 63(30.58)    |         |
| Family history of breast cancer | None                | 786(72.91)               | 58(72.50)         | 248(77.26)   | 162(78.64)   | 0.01    |
|                                 | First degree        | 156(14.47)               | 14(17.50)         | 51(15.89)    | 27(13.11)    |         |
|                                 | Second degree       | 127(11.78)               | 7(8.75)           | 21(6.54)     | 14(6.80)     |         |
|                                 | Missing             | 9(0.83)                  | 1(1.25)           | 1(0.31)      | 3(1.46)      |         |
| Educational level               | Less than primary   | 142(13.17)               | 16(20.00)         | 56(17.45)    | 48(23.30)    | <0.001  |
|                                 | Primary education   | 351(32.56)               | 25(31.25)         | 104(32.40)   | 75(36.41)    |         |
|                                 | Secondary education | 368(34.14)               | 26(32.50)         | 106(33.02)   | 53(25.73)    |         |
|                                 | University          | 217(20.13)               | 13(16.25)         | 55(17.13)    | 30(14.56)    |         |
| Civil status                    | Single              | 131(12.15)               | 11(13.75)         | 44(13.71)    | 35(16.99)    | <0.001  |
|                                 | Married             | 750(69.57)               | 44(55.00)         | 212(66.04)   | 115(55.83)   |         |

|         |                            |            |           |            |            |        |
|---------|----------------------------|------------|-----------|------------|------------|--------|
|         | Live in company            | 90(8.35)   | 14(17.50) | 26(8.10)   | 11(5.34)   |        |
|         | Widow                      | 105(9.74)  | 11(13.75) | 36(11.21)  | 44(21.36)  |        |
|         | Missing                    | 2(0.19)    | 0(0.00)   | 3(0.93)    | 1(0.49)    |        |
| Smoking | No smoker at diagnosis     | 587(54.45) | 46(57.50) | 169(52.65) | 143(69.42) | 0.01   |
|         | Former smoker at diagnosis | 295(27.37) | 19(23.75) | 80(24.92)  | 37(17.96)  |        |
|         | Smoker at diagnosis        | 196(18.18) | 15(18.75) | 72(22.43)  | 26(12.62)  |        |
| BMI     | <18.5                      | 23(2.13)   | 3(3.75)   | 1(0.31)    | 3(1.46)    | <0.001 |
|         | 18.5-24.9                  | 508(47.12) | 26(32.50) | 155(48.29) | 74(35.92)  |        |
|         | 25-29.9                    | 355(32.93) | 33(41.25) | 100(31.15) | 84(40.78)  |        |
|         | ≥30                        | 192(17.81) | 18(22.50) | 65(20.25)  | 45(21.84)  |        |

**Table S3.** Description of tumour characteristics according to answering or not QoL questionnaires.

|                             |                           |           | QoL questionnaire (N(%)) |            |            |            | p-value |
|-----------------------------|---------------------------|-----------|--------------------------|------------|------------|------------|---------|
|                             |                           |           | Refused to answer        | Answered   | No located | Exitus     |         |
| Tumour characteristics      | Tumor size                | T0        | 0(0.00)                  | 17(1.58)   | 2(0.62)    | 4(1.94)    | <0.001  |
|                             |                           | T1        | 41(51.25)                | 611(56.68) | 166(51.71) | 58(28.16)  |         |
|                             |                           | T2        | 23(28.75)                | 248(23.01) | 79(24.61)  | 74(35.92)  |         |
|                             |                           | T3        | 3(3.75)                  | 36(3.34)   | 12(3.74)   | 22(10.68)  |         |
|                             |                           | T4        | 3(3.75)                  | 12(1.11)   | 6(1.87)    | 18(8.74)   |         |
|                             |                           | Tis       | 4(5.00)                  | 87(8.07)   | 15(4.67)   | 3(1.46)    |         |
|                             |                           | Missing   | 6(7.50)                  | 67(6.22)   | 41(12.77)  | 27(13.11)  |         |
|                             | Node infiltration         | N0        | 39(48.75)                | 625(57.98) | 153(47.66) | 60(29.13)  | <0.001  |
|                             |                           | N1        | 19(23.75)                | 286(26.53) | 80(24.92)  | 56(27.18)  |         |
|                             |                           | N2        | 13(16.25)                | 67(6.22)   | 28(8.72)   | 34(16.50)  |         |
|                             |                           | N3        | 3(3.75)                  | 17(1.58)   | 11(3.43)   | 18(8.74)   |         |
|                             |                           | Missing   | 6(7.50)                  | 83(7.70)   | 49(15.26)  | 38(18.45)  |         |
|                             | Metastasis                | No        | 67(83.75)                | 930(86.27) | 254(79.13) | 132(64.08) | <0.001  |
|                             |                           | Yes       | 3(3.75)                  | 5(0.46)    | 5(1.56)    | 29(14.08)  |         |
| Missing                     |                           | 10(12.50) | 143(13.27)               | 62(19.31)  | 45(21.84)  |            |         |
| Complete clinical remission | No                        | 2(2.50)   | 24(2.23)                 | 9(2.80)    | 42(20.39)  | <0.001     |         |
|                             | Yes                       | 74(92.50) | 964(89.42)               | 298(92.83) | 150(72.82) |            |         |
|                             | Missing                   | 4(5.00)   | 90(8.35)                 | 14(4.36)   | 14(6.80)   |            |         |
| Recurrence                  | No                        | 71(88.75) | 927(85.99)               | 268(83.49) | 54(26.21)  | <0.001     |         |
|                             | Yes                       | 3(3.75)   | 37(3.43)                 | 30(9.35)   | 96(46.60)  |            |         |
|                             | Missing                   | 6(7.50)   | 114(10.58)               | 23(7.17)   | 56(27.18)  |            |         |
| TNM pathological stage      | I                         | 32(40.00) | 515(47.77)               | 123(38.32) | 32(15.53)  | <0.001     |         |
|                             | II                        | 21(26.25) | 320(29.68)               | 85(26.48)  | 53(25.73)  |            |         |
|                             | III                       | 15(18.75) | 90(8.35)                 | 35(10.90)  | 38(18.45)  |            |         |
|                             | IV                        | 3(3.75)   | 5(0.46)                  | 5(1.56)    | 29(14.08)  |            |         |
|                             | Missing                   | 9(11.25)  | 148(13.73)               | 73(22.74)  | 54(26.21)  |            |         |
| Histological grade          | Well differentiated       | 17(21.25) | 228(21.15)               | 66(20.56)  | 18(8.74)   | <0.001     |         |
|                             | Moderately differentiated | 19(23.75) | 328(30.43)               | 118(36.76) | 55(26.70)  |            |         |
|                             | Poorly differentiated     | 18(22.50) | 209(19.39)               | 70(21.81)  | 58(28.16)  |            |         |
|                             | Missing                   | 26(32.50) | 313(29.04)               | 67(20.87)  | 75(36.41)  |            |         |

|                   |                 |           |            |            |           |        |
|-------------------|-----------------|-----------|------------|------------|-----------|--------|
| Intrinsic subtype | Luminal A       | 54(67.50) | 664(61.60) | 181(56.39) | 98(47.57) | <0.001 |
|                   | Luminal B       | 14(17.50) | 196(18.18) | 75(23.36)  | 46(22.33) |        |
|                   | Her2            | 3(3.75)   | 56(5.19)   | 5(1.56)    | 17(8.25)  |        |
|                   | Basal-like      | 3(3.75)   | 64(5.94)   | 24(7.48)   | 39(18.93) |        |
|                   | Luminal ONI     | 4(5.00)   | 60(5.57)   | 25(7.79)   | 2(0.97)   |        |
|                   | Non-luminal ONI | 1(1.25)   | 10(0.93)   | 2(0.62)    | 0(0.00)   |        |
|                   | Missing         | 1(1.25)   | 28(2.60)   | 9(2.80)    | 4(1.94)   |        |

Luminal ONI: Luminal Otherwise Non Indicated (hormone receptors positive, HER2 receptors missing). Non-luminal ONI: Non-luminal Otherwise Non Indicated (hormone receptors negative, HER2 receptors missing.)

**Table S4.** Description of the treatment received.

| Treatment received    |              | Questionnaire QoL (N(%)) |            |            |           | p-value |
|-----------------------|--------------|--------------------------|------------|------------|-----------|---------|
|                       |              | Refused to answer        | Answered   | No located | Exitus    |         |
| Immunotherapy         | No           | 50(94.34)                | 760(91.02) | 187(89.90) | 75(88.24) | 0.64    |
|                       | Yes          | 3(5.66)                  | 75(8.98)   | 21(10.10)  | 10(11.76) |         |
| Hormone therapy       | No           | 17(32.08)                | 273(32.69) | 86(41.35)  | 36(42.35) | 0.05    |
|                       | Yes          | 36(67.92)                | 562(67.31) | 122(58.65) | 49(57.65) |         |
| Chemotherapy          | No           | 29(54.72)                | 425(50.90) | 109(52.40) | 44(51.76) | 0.94    |
|                       | Yes          | 24(45.28)                | 410(49.10) | 99(47.60)  | 41(48.24) |         |
| HER2-targeted therapy | No           | 47(88.68)                | 698(83.59) | 173(83.17) | 77(90.59) | 0.34    |
|                       | Yes          | 3(5.66)                  | 67(8.02)   | 16(7.69)   | 7(8.24)   |         |
|                       | Missing      | 3(5.66)                  | 70(8.38)   | 19(9.13)   | 1(1.18)   |         |
| Radiotherapy          | No           | 8(15.09)                 | 151(18.08) | 53(25.48)  | 26(30.59) | <0.01   |
|                       | Yes          | 43(81.13)                | 646(77.37) | 125(60.10) | 53(62.35) |         |
|                       | Missing      | 2(3.77)                  | 38(4.55)   | 30(14.42)  | 6(7.06)   |         |
| Surgery               | Conservative | 44(83.02)                | 659(78.92) | 153(73.56) | 61(71.76) | 0.15    |
|                       | Mastectomy   | 9(16.98)                 | 176(21.08) | 55(26.44)  | 24(28.24) |         |

Based on women with TNM stage I or II

**Table S5.** Comparison between the means of PCS-12 and Monteagudo's CSF references values for each group of ages.

|  | Age at diagnosis | This article PCS-12 |                      | Monteagudo's CSF Healthy and chronically disease women <sup>20</sup> |                     | Monteagudo's CSF Healthy women <sup>20</sup> |                     |
|--|------------------|---------------------|----------------------|----------------------------------------------------------------------|---------------------|----------------------------------------------|---------------------|
|  |                  | n                   | Mean (95% CI) *      | n                                                                    | Mean (95% CI) **    | n                                            | Mean (95% CI) **    |
|  | 35 – 44          | 163                 | 47.30 (45.25, 49.36) | 330                                                                  | 51.5 (50.67, 52.33) | 149                                          | 53.5 (52.63, 54.37) |
|  | 45 – 54          | 334                 | 45.20 (43.71, 46.68) | 247                                                                  | 49.8 (48.6, 51.0)   | 78                                           | 54.2 (53.45, 54.95) |
|  | 55 – 64          | 329                 | 45.34 (43.86, 46.83) | 187                                                                  | 42.9 (41.02, 44.78) | 19                                           | 53.5 (52.2, 54.8)   |
|  | 65 – 74          | 164                 | 44.07 (41.96, 46.17) | 165                                                                  | 39.8 (37.89, 41.71) | 12                                           | 49.6 (45.02, 54.18) |
|  | ≥75              | 56                  | 40.57 (36.78, 44.36) | 161                                                                  | 34.3 (32.31, 36.29) | 7                                            | 47.3 (41.67, 52.93) |

\*Results adjusted for educational level, province of recruitment, stage breast cancer at diagnosis, and grade of differentiation. \*\*Monteagudo's confidence intervals had been calculated for this article.
